# Supplementary material
Source: Springer Nature journal article supplement (https://www.springermedizin.de/resource/supplementary/12906_2007_150_MOESM3_ESM.pdf/9524122)
Supplement: MOESM3 [file 9524122]

RA Patients followed at the Prince of Wales Hospital  
N=491

Fulfill inclusion and exclusion criteria  
N=80

Excluded because patients were not interested or unable to find time off work  
n=44

Total number of patients randomized  
N=36

Randomized to Electroacupuncture  
N=12

Randomized to Traditional acupuncture  
N=12

Randomized to Sham Acupuncture  
N=12

Defaulted after first visit (n=1)  
Change in DMARD at week 5 (n=1)

Change in DMARD at week 2, 2, 5, 11 and 13 (n=5)

Completed 20 weeks study  
N=12

Completed 10 weeks study  
N=10  
Completed 20 weeks study  
N=10

Completed 10 weeks study  
N=9  
Completed 20 weeks study  
N=7
